# Supplementary material for: MAIT cell alterations in adults with recent-onset and long-term type 1 diabetes
Source: PubMed Central journal article supplement (PMC8336671; doi:10.1007/s00125-021-05527-y), 2021-08-04
Supplement: 125_2021_5527_MOESM1_ESM.pdf [file 125_2021_5527_MOESM1_ESM.pdf]

**ESM Table 1: MAIT cell alterations in adults with type 1 diabetes (T1D).**

|                       | Men and women            |                                                                        | Women                                                                |                                                                          |
|-----------------------|--------------------------|------------------------------------------------------------------------|----------------------------------------------------------------------|--------------------------------------------------------------------------|
|                       | RO T1D                   | LT T1D                                                                 | LT T1D                                                               | LT T1D and AID                                                           |
| MAIT cell frequency   |                          | CD8 <sup>+</sup> MAIT cells (-)<br>DN MAIT cells (-)                   | DN MAIT cells (-)                                                    | MAIT cells (-)<br>CD8 <sup>+</sup> MAIT cells (-)<br>DN MAIT cells (- -) |
| MAIT cell homeostasis |                          | Ki67 (++)<br>CD127 (+)                                                 |                                                                      | CD127 (- -)<br>BCL-2 (- -)                                               |
| MAIT cell activation  | CD25 (++++)<br>IL-4 (++) | CD25 (+++)<br>IL-4 (++)<br>IL-17 (+)                                   | CD25 (+++)                                                           | CD69 (+)<br>CD25 (++)                                                    |
| MAIT cell exhaustion  |                          | PD1 (++)<br>IL-2 (- - - -)<br>IFN- $\gamma$ (- -)<br>TNF- $\alpha$ (-) | PD1 (++)<br>IL-2 (- -)<br>IFN- $\gamma$ (- -)<br>TNF- $\alpha$ (- -) | PD1 (+++)<br>IL-2 (-)<br>IFN- $\gamma$ (-)<br>TNF- $\alpha$ (- - - -)    |

The '-' and '+' symbols in brackets respectively represent the decrease or the increase of the frequency of MAIT cells expressing the corresponding parameter compared to healthy individuals.

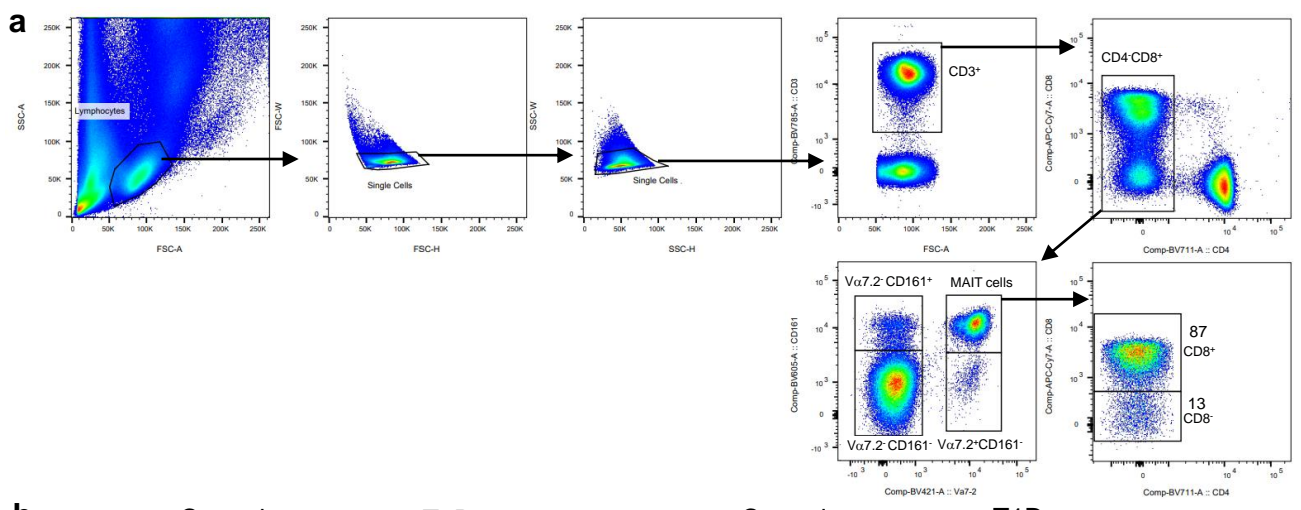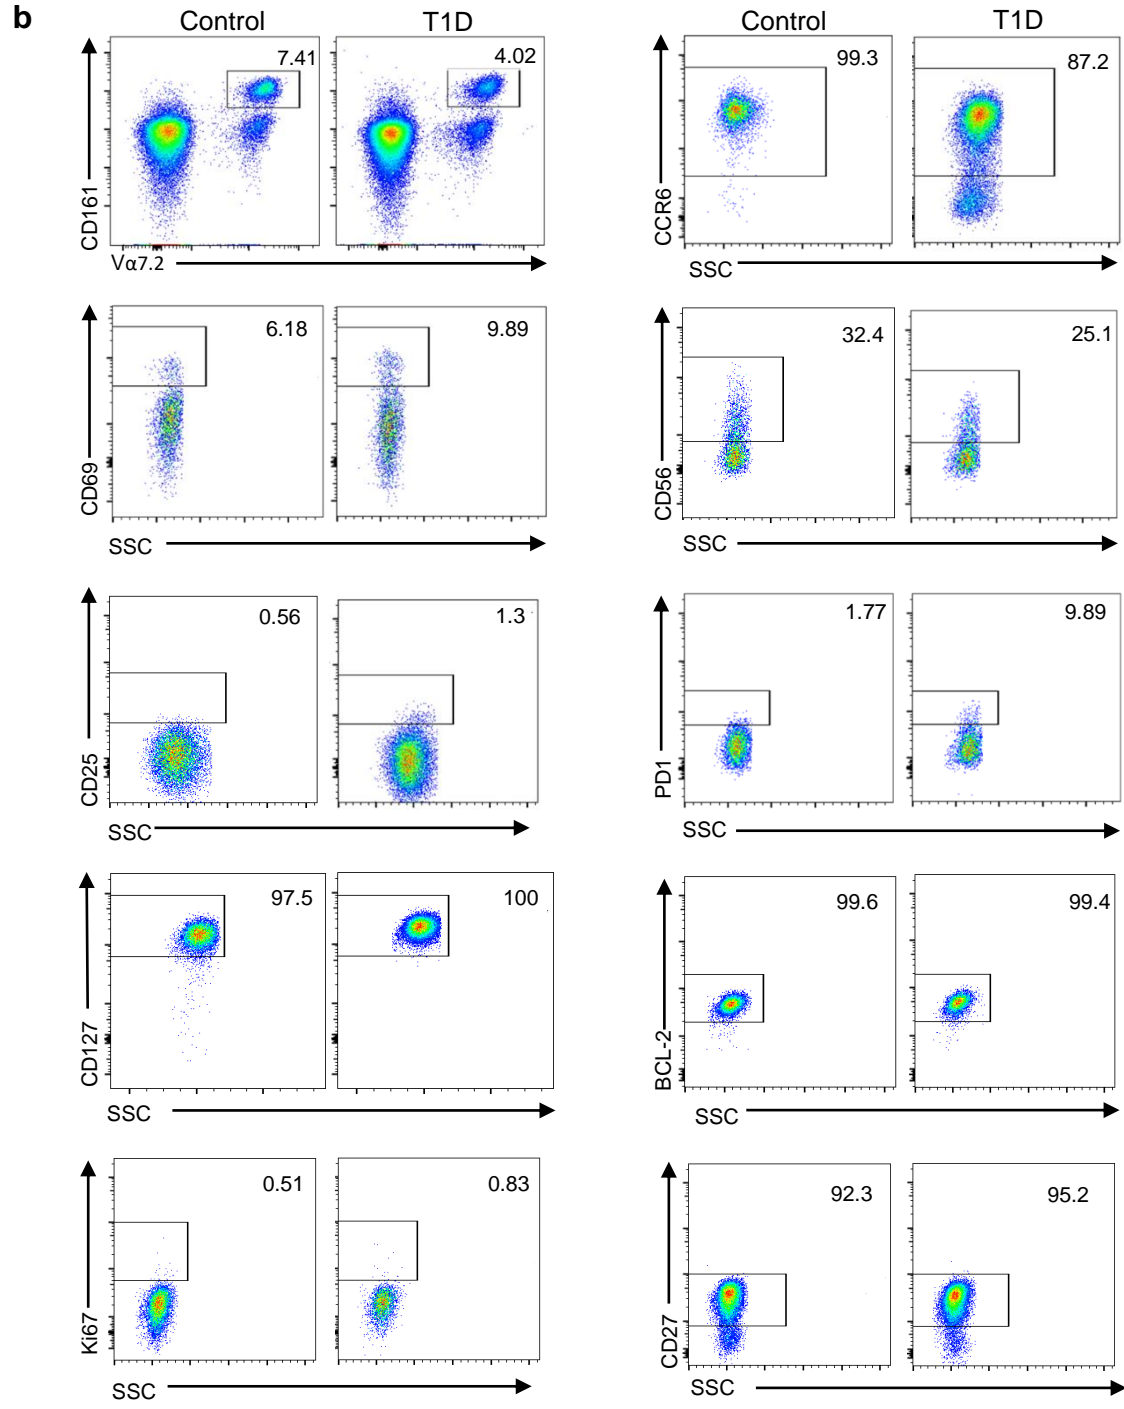

**ESM Fig. 1 Flow cytometry gating strategy for MAIT cell identification, activation and exhaustion.** Surface gating strategy, in the blood of a healthy adult donor, of circulating MAIT cell frequency used in Fig. 1 and 5 (a). Representative dot plot of CCR6<sup>+</sup>, CD69<sup>+</sup>, CD56<sup>+</sup>, CD25<sup>+</sup>, PD1<sup>+</sup>, CD127<sup>+</sup>, BCL-2<sup>+</sup>, Ki67<sup>+</sup> and CD27<sup>+</sup> MAIT cells in blood from a healthy adult donor and an adult patient with long-term type 1 diabetes (b). Percentage cell frequencies are shown next to the outlined areas. FSC, Forward scatter. SSC, Side scatter.

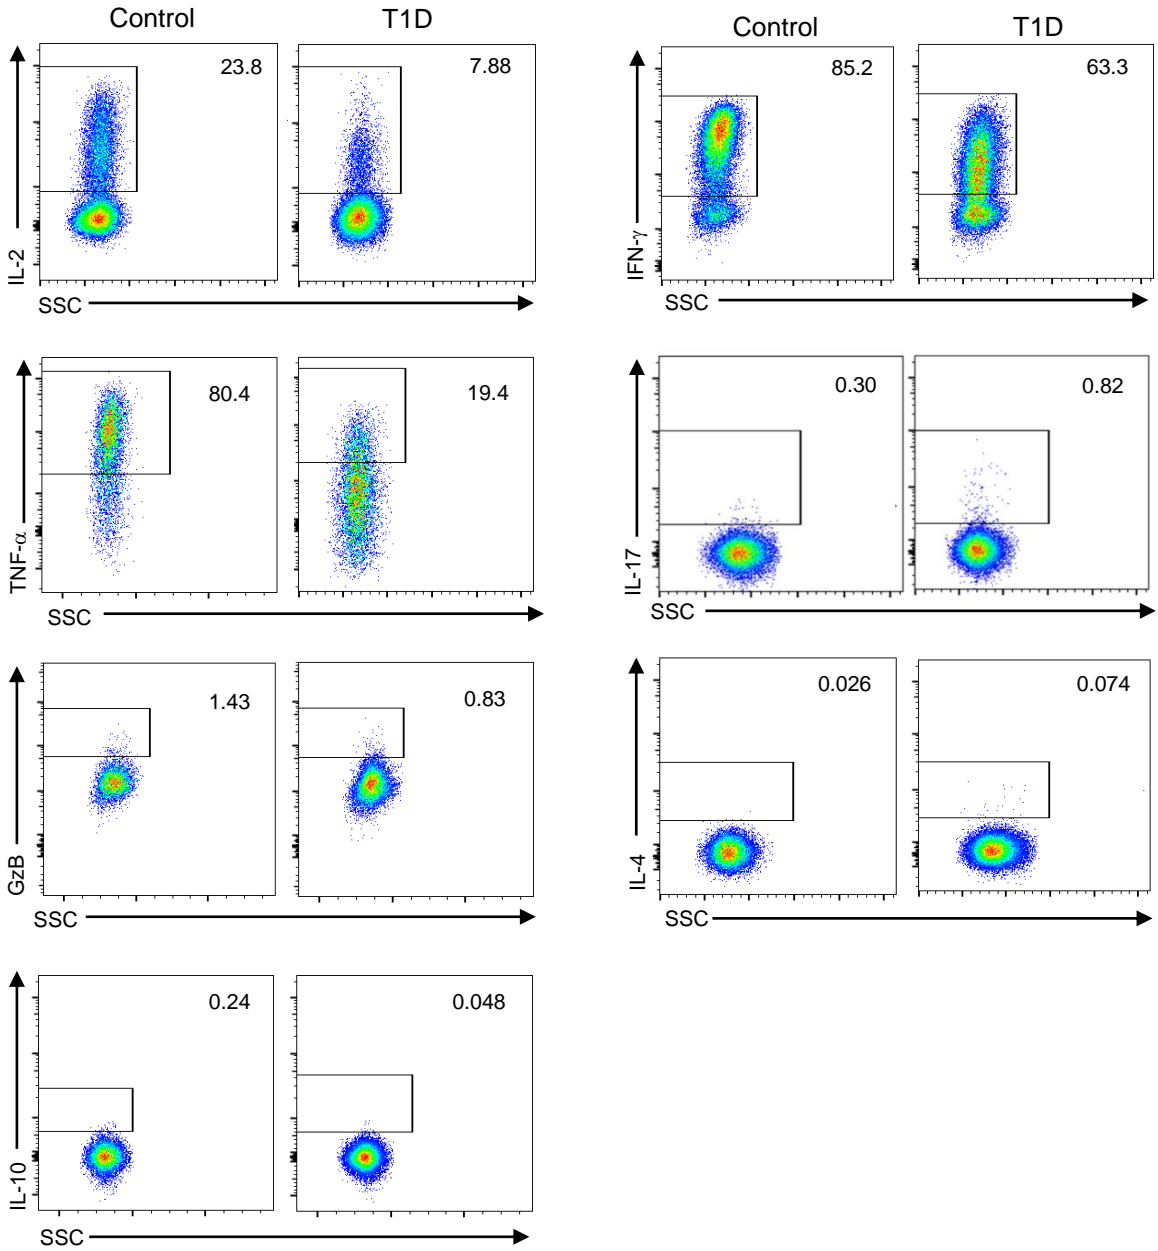

**ESM Fig. 2** Flow cytometry gating strategy for MAIT cell function. Representative dot plot of IL-2<sup>+</sup>, INF- $\gamma$ <sup>+</sup>, TNF- $\alpha$ <sup>+</sup>, IL-17<sup>+</sup>, GzB<sup>+</sup>, IL-4<sup>+</sup> and IL-10<sup>+</sup> MAIT cell in blood from a healthy adult donor and an adult patient with long-term type 1 diabetes. Percentage cell frequencies are shown next to the outlined areas. SSC, Side scatter.

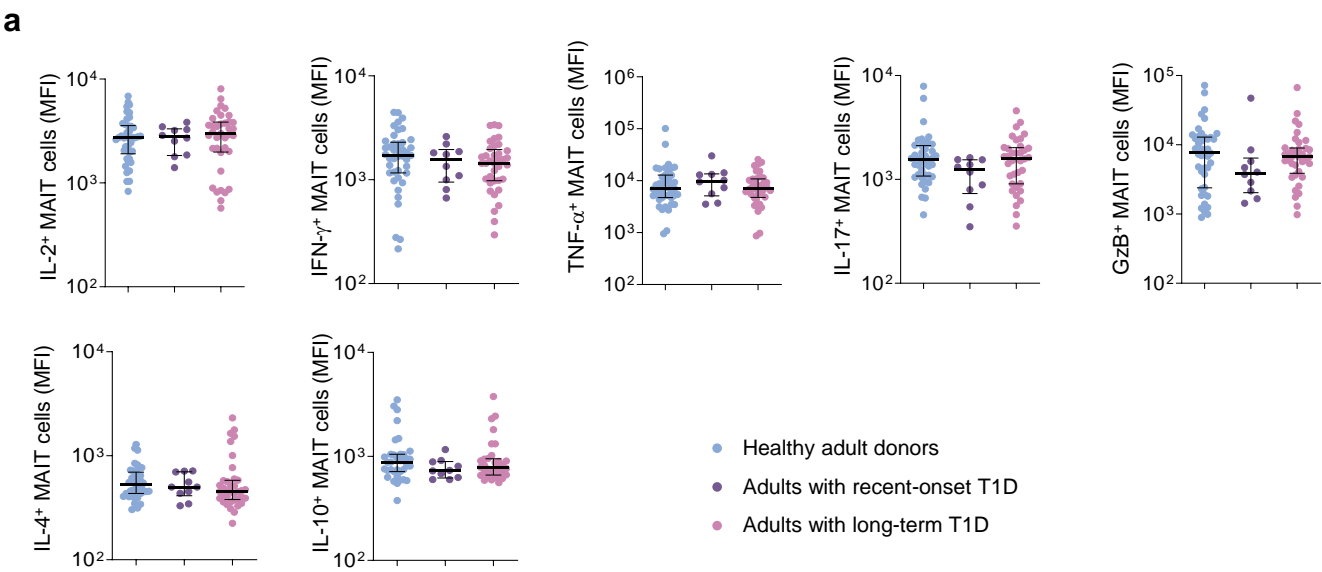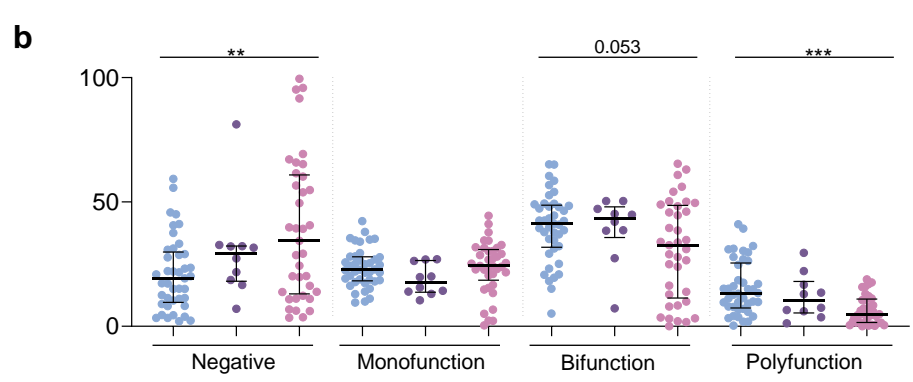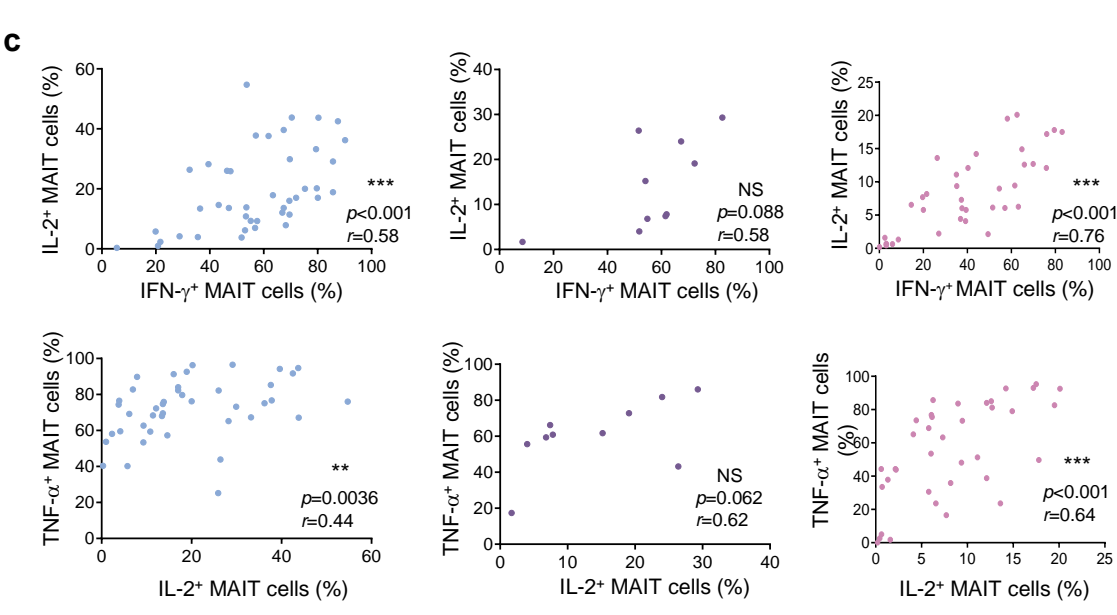

**ESM Fig. 3 Functional analysis of MAIT cells in adults with recent onset and long-term type 1 diabetes.** Flow cytometry analysis of IL-2<sup>+</sup>, IFN- $\gamma$ <sup>+</sup>, TNF- $\alpha$ <sup>+</sup>, IL-17<sup>+</sup>, Granzyme B<sup>+</sup> (GzB), IL-4<sup>+</sup> or IL-10<sup>+</sup> MAIT cell Mean Fluorescence Intensity (MFI) among total MAIT cells in healthy adult donors (n=42), adult patients with recent onset (RO) (n=10) or long-term (LT) (n=37) type 1 diabetes (a). Frequency of cumulative Th1 cytokines, IL-17, and GzB from Fig. 2a with negative as 0, monofunctional as 1, bifunctional as 2 and polyfunctional from 3 up to 5 different cytokine production by MAIT cells in healthy donors (n=42), patients with RO (n=10) or LT (n=37) type 1 diabetes (b). Correlations between IL-2<sup>+</sup> MAIT cell and IFN- $\gamma$ <sup>+</sup> MAIT cell frequencies, between TNF- $\alpha$ <sup>+</sup> MAIT cell and IL-2<sup>+</sup> MAIT cell frequencies in healthy donors (n=42), patients with RO (n=10) or LT (n=37) type 1 diabetes (c). Each symbol represents an individual subject. Small horizontal lines indicate median with interquartile range. \*  $p < 0.05$ , \*\*  $p < 0.01$ , \*\*\*  $p < 0.001$  (non-parametric two-tailed Mann-Whitney test or Spearman's correlation test).

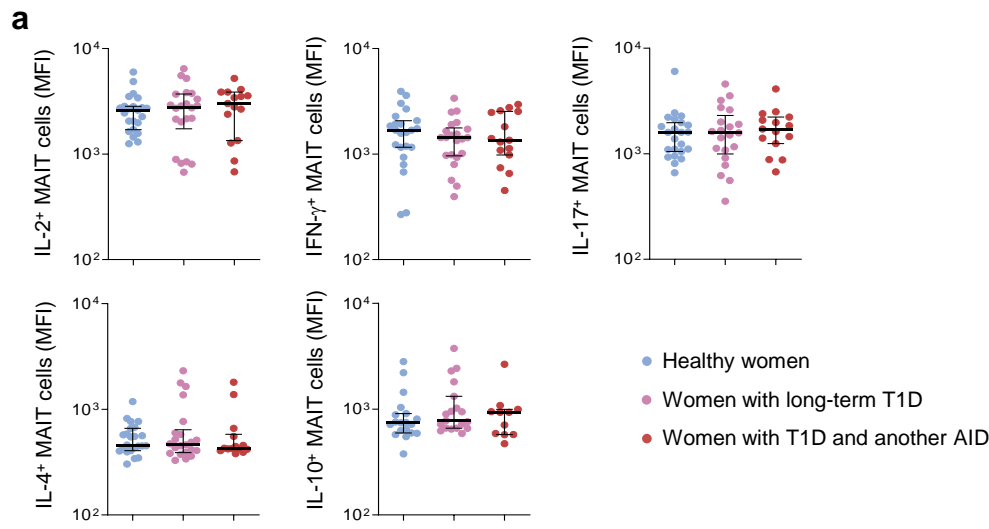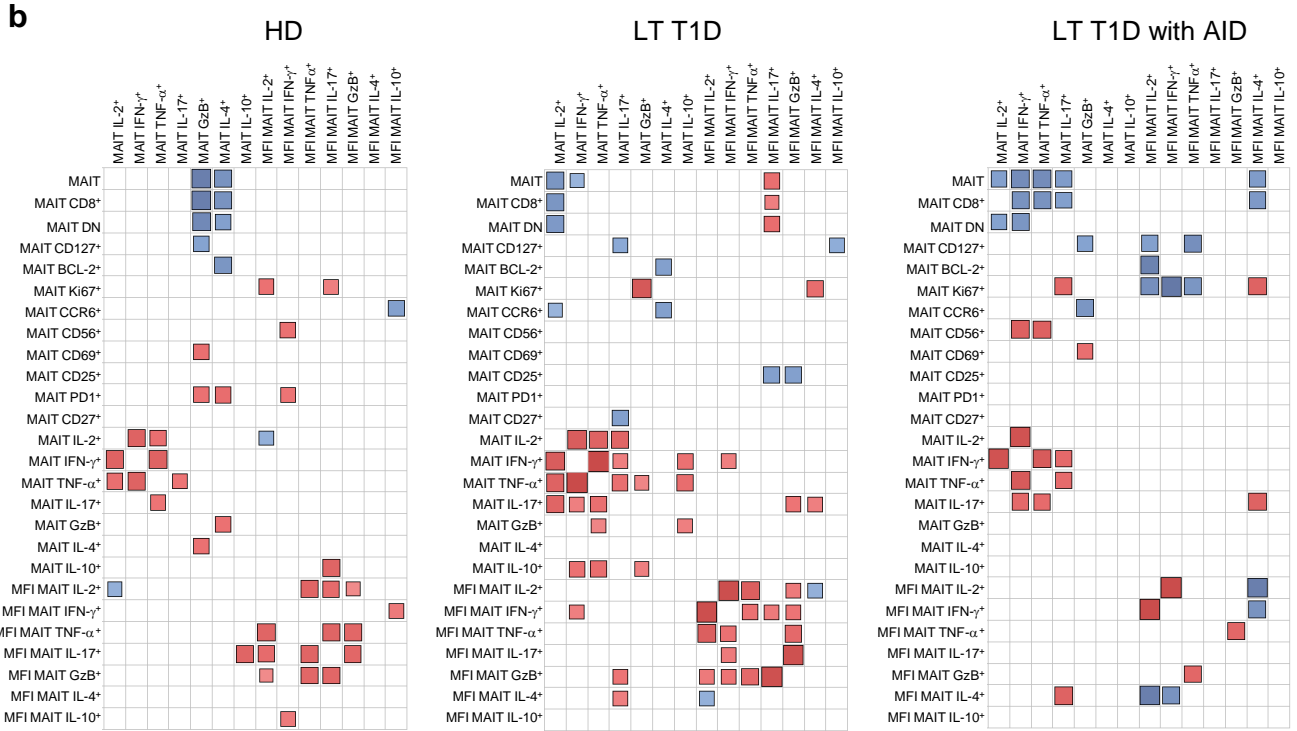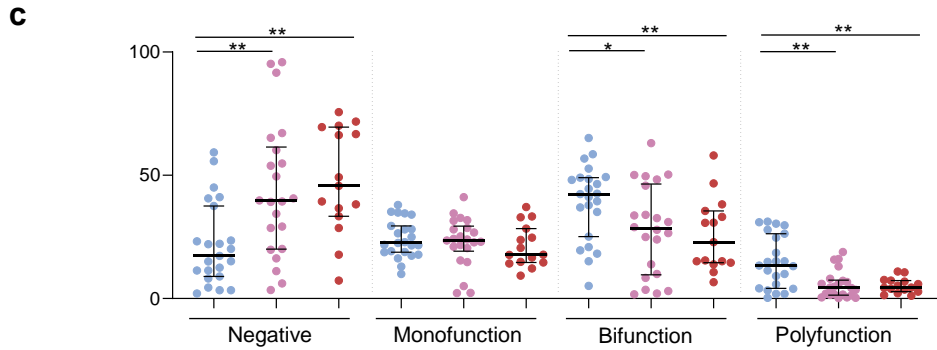

**ESM Fig. 4 Functional analysis of MAIT cells in women with long-term type 1 diabetes and long-term type 1 diabetes with another autoimmune disease.** Flow cytometry analysis of IL-2<sup>+</sup>, IFN- $\gamma$ <sup>+</sup>, IL-17<sup>+</sup>, IL-4<sup>+</sup> or IL-10<sup>+</sup> MAIT cell Mean Fluorescence Intensity (MFI) among total MAIT cells in healthy women donors (n=22), women with long-term (LT) (n=23) type 1 diabetes or LT type 1 diabetes with another auto-immune disease (AID) (n=15) (a). Correlogram of circulating MAIT cell frequency, phenotype, function and MFI presented in Fig. 5a, 6a and in ESM Fig. 4a in healthy women donors (n=15-30), women patients with LT type 1 diabetes (n=14-27) or LT type 1 diabetes with another AID (n=9-17). Only significant Spearman's correlation coefficients are represented by color intensity and square size (b). Frequency of cumulative Th1 cytokines, IL-17, and GzB production from Figure 6a with negative as 0, monofunctional as 1, bifunctional as 2 and polyfunctional from 3 up to 5 different cytokine expression on MAIT cells in healthy women donors (n=22), women with LT type 1 diabetes (n=23) or LT type 1 diabetes with another AID (n=15) (c). \*  $p < 0.05$ , \*\*  $p < 0.01$  (non-parametric two-tailed Mann-Whitney tests or Spearman's correlation test).
